# Supplementary material for: Alcohol-Induced Alterations in the Vascular Basement Membrane in the Substantia Nigra of the Adult Human Brain
Source: MDPI journal article supplement (doi:10.3390/biomedicines10040830), 2022-04-01
Supplement: s1 [file s1]

## SUPPLEMENTARY MATERIAL

# Alcohol-Induced Alterations in the Vascular Basement Membrane in the *Substantia Nigra* of Adult Human Brain

Sandra Skuja, Nityanand Jain, Marks Smirnovs, and Modra Murovska

### Index

1. **Supplementary Table S1.** Characteristics of brain autopsy individuals.
2. **Supplementary Table S2.** Frequencies (%) showing the distribution of vessels based on the semi-quantitative grading scale for thickness in different regions of Substantia Nigra (SN).
3. **Supplementary Table S3.** Frequencies (%) showing the distribution of vessels based on the semi-quantitative gradingscale for integrity in different regions of *Substantia Nigra* (SN).
4. **Supplementary Table S4.** Table of measurements for the thickness of the basement membrane (BM) of the microvessels (in nm).
5. **Supplementary Figure S1.** Corrected total cell fluorescence (CTCF) depicting the immunofluorescence signal intensity for the three basement membrane proteins.
6. **Supplementary Figure S2.** Negative (phosphate-buffer saline - PBS) controls for immunohistochemistry (IHC) and immunofluorescence (IF) reactions in the SN region of the brain.

**Supplementary Table S1.** Characteristics of the brain autopsy individuals.

| Group A<br>(Control Group) |                |           | Group B<br>(Young Alcoholics) |                |           | Group C<br>(Chronic Alcoholics) |                |             |
|----------------------------|----------------|-----------|-------------------------------|----------------|-----------|---------------------------------|----------------|-------------|
| Individual<br>Code         | Age<br>(years) | Gender    | Individual<br>Code            | Age<br>(years) | Gender    | Individual<br>Code              | Age<br>(years) | Gender      |
| A1                         | 34             | M         | B1                            | 36             | F         | C1                              | 48             | M           |
| A2                         | 31             | M         | B2                            | 23             | M         | C2                              | 55             | M           |
| A3                         | 27             | M         | B3                            | 31             | M         | C3                              | 60             | M           |
| A4                         | 23             | M         | B4                            | 26             | M         | C4                              | 50             | F           |
| A5                         | 32             | M         | B5                            | 33             | M         | C5                              | 63             | M           |
| A6                         | 37             | M         | B6                            | 34             | F         | C6                              | 45             | M           |
| A7                         | 33             | M         | B7                            | 25             | F         | C7                              | 45             | M           |
| A8                         | 22             | M         | B8                            | 30             | M         | C8                              | 55             | M           |
| A9                         | 36             | M         | B9                            | 35             | M         | C9                              | 45             | F           |
| A10                        | 17             | M         | B10                           | 22             | M         | C10                             | 60             | F           |
| A11                        | 37             | M         | B11                           | 35             | M         | C11                             | 66             | M           |
| A12                        | 20             | M         | B12                           | 34             | M         | C12                             | 63             | M           |
| A13                        | 26             | M         | B13                           | 29             | M         | C13                             | 44             | F           |
|                            |                |           |                               |                |           | C14                             | 49             | M           |
|                            |                |           |                               |                |           | C15                             | 45             | F           |
|                            |                |           |                               |                |           | C16                             | 60             | M           |
|                            |                |           |                               |                |           | C17                             | 38             | F           |
|                            |                |           |                               |                |           | C18                             | 40             | M           |
| Group Median Age           |                | 31 ± 6.79 | Group Median Age              |                | 31 ± 4.85 | Group Median Age                |                | 49.5 ± 8.66 |

**Supplementary Table S2.** Frequencies (%) showing the distribution of vessels based on the semi-quantitative grading scale for thickness in different regions of *Substantia Nigra* (SN).

| Region             | Group | Grade I (%) | Grade II (%) | Grade III (%) |
|--------------------|-------|-------------|--------------|---------------|
| <i>Collagen-IV</i> |       |             |              |               |
| SNpc Gray Matter   | A     | 91.90       | 07.80        | 00.30         |
|                    | B     | 90.30       | 09.20        | 00.50         |
|                    | C     | 81.20       | 18.10        | 00.70         |
| SNpc White Matter  | A     | 87.94       | 12.06        | 00.00         |
|                    | B     | 85.82       | 13.99        | 00.19         |
|                    | C     | 82.04       | 17.25        | 00.72         |
| SNpr Gray Matter   | A     | 93.75       | 06.25        | 00.00         |
|                    | B     | 87.06       | 12.89        | 00.05         |
|                    | C     | 84.26       | 15.67        | 00.07         |
| SNpr White Matter  | A     | 88.55       | 11.45        | 00.00         |
|                    | B     | 85.13       | 13.75        | 01.12         |
|                    | C     | 81.16       | 17.04        | 01.80         |
| <i>Laminin-111</i> |       |             |              |               |
| SNpc Gray Matter   | A     | 86.94       | 12.96        | 00.10         |
|                    | B     | 82.64       | 15.52        | 01.85         |
|                    | C     | 79.07       | 16.99        | 03.95         |
| SNpc White Matter  | A     | 82.07       | 17.93        | 00.00         |
|                    | B     | 79.78       | 19.13        | 01.09         |
|                    | C     | 74.89       | 22.21        | 02.91         |
| SNpr Gray Matter   | A     | 83.70       | 16.30        | 00.00         |
|                    | B     | 79.27       | 18.79        | 01.94         |
|                    | C     | 74.64       | 21.20        | 04.16         |
| SNpr White Matter  | A     | 81.48       | 18.29        | 00.23         |
|                    | B     | 75.84       | 22.68        | 01.49         |
|                    | C     | 69.87       | 25.90        | 04.23         |
| <i>Fibronectin</i> |       |             |              |               |
| SNpc Gray Matter   | A     | 88.55       | 11.45        | 00.00         |
|                    | B     | 85.12       | 13.90        | 00.98         |
|                    | C     | 80.74       | 16.78        | 02.47         |
| SNpc White Matter  | A     | 81.78       | 17.84        | 00.38         |
|                    | B     | 71.43       | 25.37        | 03.20         |
|                    | C     | 66.87       | 28.19        | 04.95         |
| SNpr Gray Matter   | A     | 87.96       | 11.90        | 00.13         |
|                    | B     | 85.08       | 13.87        | 01.05         |
|                    | C     | 81.49       | 16.05        | 02.45         |
| SNpr White Matter  | A     | 83.79       | 16.21        | 00.00         |
|                    | B     | 77.82       | 20.30        | 01.88         |
|                    | C     | 71.09       | 23.87        | 05.04         |

Abbreviations: SNpc: *Substantia Nigra pars compacta*; SNpr: *Substantia Nigra pars reticulata*. Group A – controls, Group B – young alcoholics and Group C – chronic alcoholics.

**Supplementary Table S3.** Frequencies (%) showing the distribution of vessels based on the semi-quantitative grading scale for integrity in different regions of *Substantia Nigra* (SN).

| Region             | Group | Grade I (%) | Grade II (%) | Grade III (%) |
|--------------------|-------|-------------|--------------|---------------|
| <i>Collagen-IV</i> |       |             |              |               |
| SNpc Gray Matter   | A     | 81.60       | 16.70        | 01.70         |
|                    | B     | 77.40       | 20.70        | 01.90         |
|                    | C     | 71.90       | 21.90        | 06.20         |
| SNpc White Matter  | A     | 88.93       | 10.47        | 00.59         |
|                    | B     | 82.04       | 16.45        | 01.51         |
|                    | C     | 80.72       | 17.01        | 02.28         |
| SNpr Gray Matter   | A     | 83.67       | 15.32        | 01.01         |
|                    | B     | 80.76       | 17.58        | 01.66         |
|                    | C     | 79.14       | 17.64        | 03.22         |
| SNpr White Matter  | A     | 88.12       | 11.66        | 00.22         |
|                    | B     | 80.30       | 17.84        | 01.86         |
|                    | C     | 75.07       | 20.22        | 04.71         |
| <i>Laminin-111</i> |       |             |              |               |
| SNpc Gray Matter   | A     | 78.58       | 21.42        | 00.00         |
|                    | B     | 78.20       | 21.67        | 00.12         |
|                    | C     | 62.56       | 35.27        | 02.17         |
| SNpc White Matter  | A     | 83.07       | 16.93        | 00.00         |
|                    | B     | 78.70       | 21.30        | 00.00         |
|                    | C     | 65.70       | 32.62        | 01.68         |
| SNpr Gray Matter   | A     | 82.40       | 17.60        | 00.00         |
|                    | B     | 75.16       | 24.62        | 00.22         |
|                    | C     | 68.34       | 30.69        | 00.97         |
| SNpr White Matter  | A     | 82.64       | 17.36        | 00.00         |
|                    | B     | 77.70       | 21.93        | 00.37         |
|                    | C     | 69.22       | 29.80        | 00.98         |
| <i>Fibronectin</i> |       |             |              |               |
| SNpc Gray Matter   | A     | 86.64       | 13.36        | 00.00         |
|                    | B     | 86.51       | 13.49        | 00.00         |
|                    | C     | 75.56       | 24.05        | 00.39         |
| SNpc White Matter  | A     | 92.22       | 07.40        | 00.38         |
|                    | B     | 81.88       | 14.71        | 03.41         |
|                    | C     | 74.36       | 21.44        | 04.20         |
| SNpr Gray Matter   | A     | 84.13       | 15.87        | 00.00         |
|                    | B     | 82.56       | 16.81        | 00.63         |
|                    | C     | 76.07       | 21.78        | 02.15         |
| SNpr White Matter  | A     | 90.27       | 09.73        | 00.00         |
|                    | B     | 83.46       | 15.79        | 00.75         |
|                    | C     | 77.98       | 19.33        | 02.69         |

Abbreviations: SNpc: *Substantia Nigra pars compacta*; SNpr: *Substantia Nigra pars reticulata*. Group A – controls, Group B – young alcoholics and Group C – chronic alcoholics.

**Supplementary Table S4.** Table of measurements for the thickness of the basement membrane (BM) of the microvessels (in nm).

| Vessel No.        | No. of observations | Grade of Vessel* | Average thickness of separate lamella** | Minimum thickness of basement membrane | Maximum thickness of basement membrane |
|-------------------|---------------------|------------------|-----------------------------------------|----------------------------------------|----------------------------------------|
| 1                 | 10                  | II               | 170.33 ± 82.47                          | 68.62                                  | 355.67                                 |
| 2                 | 10                  | II               | 209.05 ± 51.39                          | 131.12                                 | 285.88                                 |
| 3                 | 10                  | II               | 212.80 ± 97.92                          | 102.77                                 | 353.00                                 |
| 4                 | 10                  | I                | 97.86 ± 46.83                           | 39.42                                  | 195.34                                 |
| 5                 | 10                  | II               | 210.09 ± 94.38                          | 118.50                                 | 409.36                                 |
| 6                 | 10                  | III              | 967.66 ± 143.72                         | 753.88                                 | 1233.89                                |
| 7                 | 10                  | III              | 544.43 ± 222.28                         | 137.46                                 | 778.18                                 |
| 8                 | 10                  | II               | 168.77 ± 103.67                         | 67.97                                  | 423.66                                 |
| 9                 | 10                  | II               | 183.92 ± 86.84                          | 80.00                                  | 339.93                                 |
| 10                | 10                  | II               | 220.06 ± 116.80                         | 92.21                                  | 459.40                                 |
| 11                | 10                  | II               | 250.88 ± 194.12                         | 55.10                                  | 608.31                                 |
| 12                | 10                  | III              | 312.26 ± 266.77                         | 82.46                                  | 777.93                                 |
| 13                | 10                  | I                | 107.73 ± 47.13                          | 39.60                                  | 164.78                                 |
| 14                | 10                  | II               | 206.13 ± 120.61                         | 67.42                                  | 424.00                                 |
| 15                | 10                  | III              | 291.73 ± 241.53                         | 82.09                                  | 887.96                                 |
| 16                | 10                  | III              | 633.50 ± 723.24                         | 120.87                                 | 2406.77                                |
| 17                | 10                  | II               | 197.81 ± 135.68                         | 45.17                                  | 416.48                                 |
| 18                | 10                  | II               | 194.13 ± 160.46                         | 54.61                                  | 516.61                                 |
| 19                | 10                  | II               | 240.65 ± 97.92                          | 83.67                                  | 344.36                                 |
| 20                | 10                  | III              | 225.21 ± 223.48                         | 80.00                                  | 821.52                                 |
| 21                | 10                  | II               | 172.21 ± 73.03                          | 60.00                                  | 286.34                                 |
| 22                | 10                  | II               | 244.78 ± 126.42                         | 52.36                                  | 404.90                                 |
| 23                | 10                  | III              | 251.11 ± 255.92                         | 50.49                                  | 723.04                                 |
| 24                | 10                  | III              | 245.03 ± 205.14                         | 52.55                                  | 752.91                                 |
| 25                | 10                  | II               | 204.36 ± 131.43                         | 29.80                                  | 480.33                                 |
| 26                | 10                  | II               | 238.76 ± 166.69                         | 39.22                                  | 557.36                                 |
| 27                | 10                  | II               | 242.49 ± 68.52                          | 151.44                                 | 381.23                                 |
| 28                | 10                  | II               | 208.97 ± 135.58                         | 48.70                                  | 449.70                                 |
| 29                | 10                  | I                | 115.90 ± 38.43                          | 39.73                                  | 158.94                                 |
| 30                | 10                  | II               | 126.69 ± 75.88                          | 38.87                                  | 275.98                                 |
| <b>Average **</b> |                     |                  | 256.54 ± 173.31 nm                      | 95.54 ± 128.54 nm                      | 555.79 ± 424.61 nm                     |

\* Cumulative grade of the vessel in terms of both integrity and thickness; Grade I vessel defined as maximum thickness from 20-200 nm with smooth and homogenous basement membrane; Grade II vessel defined as maximum thickness from 201-700 nm with lamellar basement membrane and Grade III vessel defined as maximum thickness greater than 701 nm with split basement membrane. These gradings were created based on TEM observations to correlate them with the semi-quantitative scoring scale that was used for immunohistochemical analysis (refer to Figure 1). \*\* Average thickness ± standard deviation (S.D.).

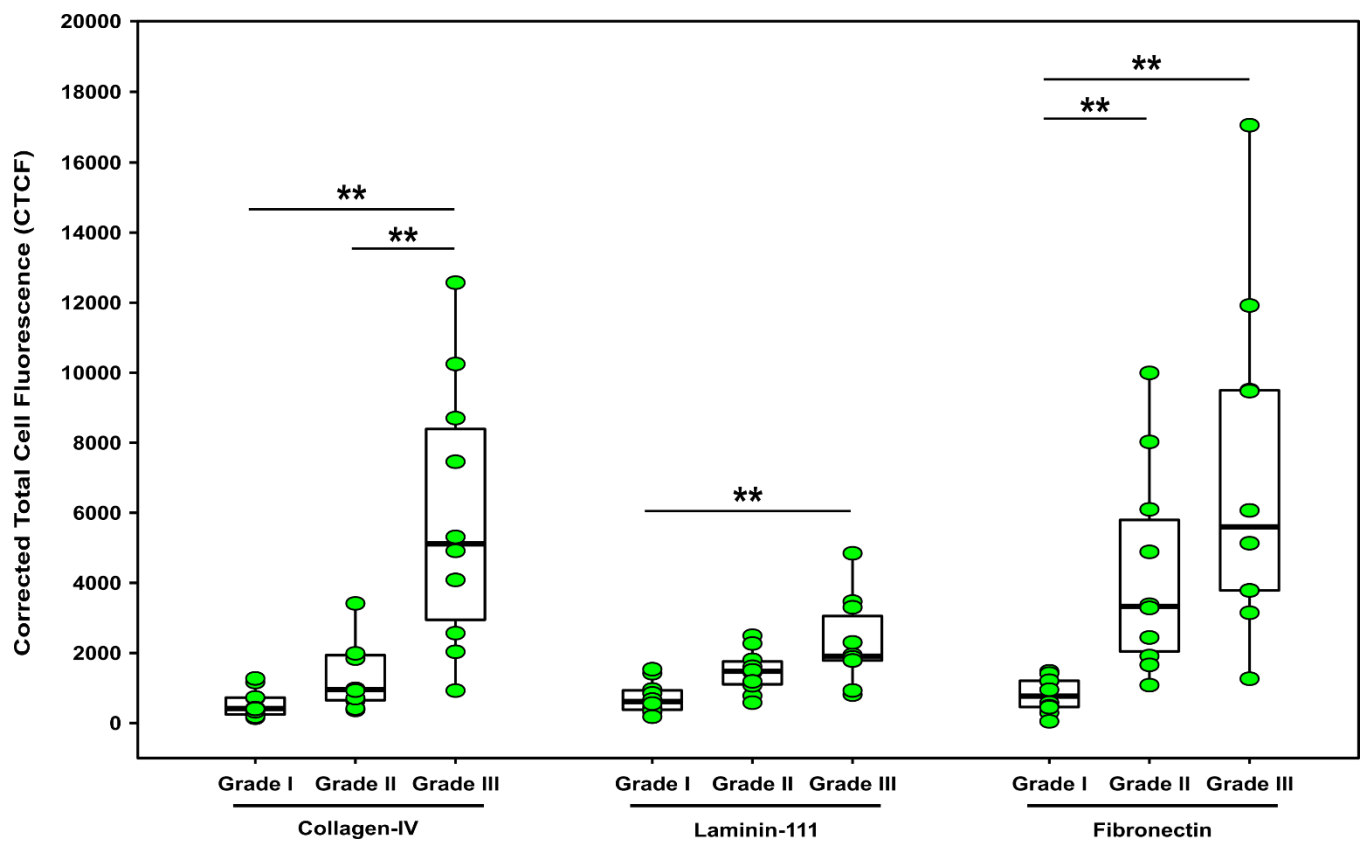

**Supplementary Figure S1.** Corrected total cell fluorescence (CTCF) depicting the immunofluorescence signal intensity for the three basement membrane proteins. \*\* indicates a significant difference between the groups ( $P < 0.05$  with Bonferroni correction is considered as significant; Related-samples Friedman's two-way ANOVA). Grade I vessel represents normal (baseline) thickness vessel with unchanged integrity; Grade II vessel represents moderately thickened vessel with damaged integrity and Grade III vessel represents extremely thickened vessel with split basement membrane.

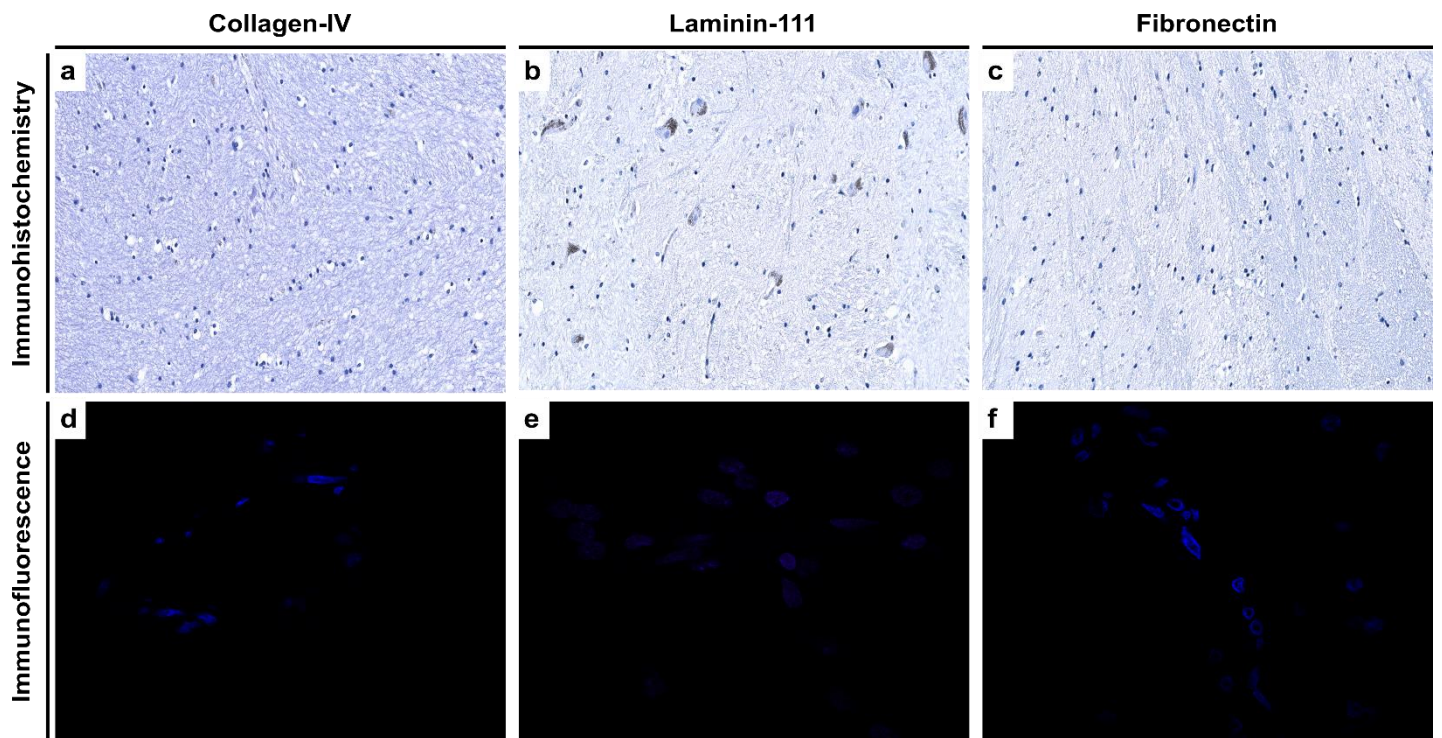

**Supplementary Figure S2.** Negative (phosphate-buffer saline - PBS) controls for (a,b,c) immunohistochemistry (IHC) and (d,e,f) immunofluorescence (IF) reactions in the SN region of the brain. In IF, blue color shows DAPI stained nuclei. Original magnification (IHC), 200×. Original magnification (IF), 1000×.
